# Supplementary material
Source: publisher figshare collection journal article supplement (https://springernature.figshare.com/ndownloader/files/9517123)
Supplement: Supplementary file [file 9517123]

## Additional file 6

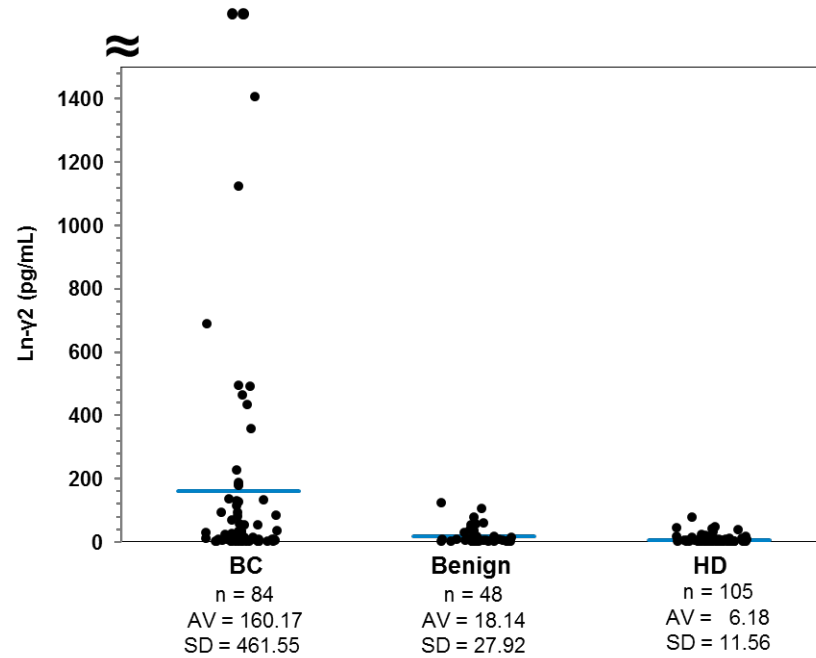

**Figure S5.**

Dot plot analysis of urine mono-Ln-γ2 with BC, benign urological disease, and HD without creatinine standardization. Dot plots of Ln-γ2 in 84 patients with bladder cancer (BC), 48 patients with benign disease, and 105 healthy donors (HDs). The standard deviation values for urinary Ln-γ2 were small in patients with benign diseases and HDs.
